# Supplementary material for: Quality and Flavor Difference in Dry-Cured Meat Treated with Low-Sodium Salts: An Emphasis on Magnesium
Source: MDPI journal article supplement (doi:10.3390/molecules29102194), 2024-05-08
Supplement: s1 [file s1]

**Supplementary Table S1.** Content of volatile compounds in dry-cured meat with the addition of different low-sodium salts.

|           |      |                    | Content (µg/kg)           |                           |                            |                            |                            |
|-----------|------|--------------------|---------------------------|---------------------------|----------------------------|----------------------------|----------------------------|
|           | RI   | Volatile compounds | S                         | SPMA                      | SPM                        | SP                         | SM                         |
| Aldehydes |      |                    |                           |                           |                            |                            |                            |
| 1         | 913  | 3-Methylbutanal    | 7.25±1.56 <sup>AB</sup>   | 5.80±0.53 <sup>B</sup>    | 11.30±2.59 <sup>AB</sup>   | 9.94±1.74 <sup>AB</sup>    | 18.27±2.71 <sup>A</sup>    |
| 2         | 933  | 2-Methylbutyral    | 6.78±1.49 <sup>AB</sup>   | 5.29±0.27 <sup>B</sup>    | 9.87±1.96 <sup>AB</sup>    | 11.37±1.12 <sup>AB</sup>   | 18.03±2.94 <sup>A</sup>    |
| 3         | 974  | Pentanal           | 6.30±0.14 <sup>B</sup>    | 7.60±0.23 <sup>AB</sup>   | 10.23±2.07 <sup>AB</sup>   | 11.99±2.32 <sup>AB</sup>   | 18.61±2.81 <sup>A</sup>    |
| 4         | 1080 | Hexanal            | 147.72±38.75 <sup>A</sup> | 161.71±32.07 <sup>A</sup> | 188.78±23.33 <sup>A</sup>  | 272.14±98.49 <sup>A</sup>  | 213.52±1.87 <sup>A</sup>   |
| 5         | 1182 | Heptaldehyde       | 22.66±4.19 <sup>B</sup>   | 24.91±0.02 <sup>B</sup>   | 27.23±3.57 <sup>B</sup>    | 62.00±10.54 <sup>A</sup>   | 37.98±3.13 <sup>AB</sup>   |
| 6         | 1278 | Octyl aldehyde     | 25.23±1.99 <sup>B</sup>   | 26.47±1.33 <sup>B</sup>   | 32.56±1.90 <sup>B</sup>    | 86.31±11.62 <sup>A</sup>   | 39.80±2.01 <sup>B</sup>    |
| 7         | 1380 | 1-Nonanal          | 48.00±2.43 <sup>B</sup>   | 56.39±0.59 <sup>B</sup>   | 73.83±6.53 <sup>B</sup>    | 120.54±12.08 <sup>A</sup>  | 75.31±2.22 <sup>B</sup>    |
| 8         | 1315 | (E)-2-Heptanal     | ND                        | 6.84±0.79 <sup>A</sup>    | 8.43±0.80 <sup>A</sup>     | ND                         | ND                         |
| 9         | 1424 | (E)-2-Octenal      | 4.64±1.10 <sup>A</sup>    | 4.27±2.63 <sup>A</sup>    | 9.43±0.94 <sup>A</sup>     | 7.34±0.64 <sup>A</sup>     | 6.15±2.28 <sup>A</sup>     |
| 10        | 1495 | Decyl aldehyde     | 5.77±1.58 <sup>B</sup>    | 5.96±0.23 <sup>B</sup>    | 11.95±0.07 <sup>AB</sup>   | 18.56±3.17 <sup>A</sup>    | 9.95±0.65 <sup>AB</sup>    |
| 11        | 1508 | Benzaldehyde       | 6.06±0.85 <sup>A</sup>    | 5.42±0.35 <sup>A</sup>    | 7.72±0.18 <sup>A</sup>     | 10.75±0.77 <sup>A</sup>    | 9.25±3.01 <sup>A</sup>     |
| 12        | 1529 | (E)-2-Nonenal      | 1.99±0.19 <sup>B</sup>    | 2.34±0.10 <sup>B</sup>    | 5.14±0.24 <sup>A</sup>     | 6.76±1.28 <sup>A</sup>     | 2.28±0.16 <sup>B</sup>     |
| 13        | 2133 | Hexadecanal        | ND                        | ND                        | ND                         | ND                         | 4.28±0.47                  |
|           |      | Total              | 282.41±50.16 <sup>B</sup> | 311.81±25.81 <sup>B</sup> | 396.46±54.57 <sup>AB</sup> | 617.68±143.78 <sup>A</sup> | 457.40±20.30 <sup>AB</sup> |
| Alcohols  |      |                    |                           |                           |                            |                            |                            |
| 14        | 1161 | 1-Penten-3-ol      | ND                        | ND                        | ND                         | ND                         | 2.99±0.38                  |
| 15        | 1185 | 3-Methyl-1-butanol | ND                        | ND                        | 3.22±0.27 <sup>A</sup>     | ND                         | 6.02±2.62 <sup>A</sup>     |
| 16        | 1260 | 1-Pentanol         | 21.83±2.38 <sup>A</sup>   | 16.66±0.12 <sup>A</sup>   | 21.92±3.33 <sup>A</sup>    | 25.96±7.48 <sup>A</sup>    | 24.60±2.94 <sup>A</sup>    |
| 17        | 1362 | 1-Hexanol          | 44.26±7.55 <sup>A</sup>   | 37.71±1.48 <sup>A</sup>   | 45.75±1.13 <sup>A</sup>    | 50.14±6.44 <sup>A</sup>    | 48.18±4.77 <sup>A</sup>    |
| 18        | 1430 | 1-Octen-3-ol       | ND                        | ND                        | 39.14±2.22 <sup>A</sup>    | 38.77±1.98 <sup>A</sup>    | 54.76±7.36 <sup>A</sup>    |

|                |      |                         |                            |                            |                            |                           |                           |
|----------------|------|-------------------------|----------------------------|----------------------------|----------------------------|---------------------------|---------------------------|
| 19             | 1447 | 1-Heptanol              | 8.64±1.13 <sup>B</sup>     | 8.47±0.03 <sup>B</sup>     | 11.11±0.11 <sup>B</sup>    | 14.76±0.19 <sup>B</sup>   | 29.58±2.85 <sup>A</sup>   |
| 20             | 1542 | 2,3-Butanediol          | 13.06±0.24 <sup>B</sup>    | 20.38±0.51 <sup>AB</sup>   | 23.19±1.93 <sup>A</sup>    | 18.11±0.61 <sup>AB</sup>  | 26.33±1.60 <sup>A</sup>   |
| 21             | 1567 | 1-octanol               | ND                         | 10.33±0.43 <sup>B</sup>    | 14.30±0.55 <sup>AB</sup>   | 19.12±0.74 <sup>A</sup>   | 14.90±1.64 <sup>AB</sup>  |
|                |      | Total                   | 87.80±13.92 <sup>B</sup>   | 93.55±2.59 <sup>B</sup>    | 158.64±19.11 <sup>A</sup>  | 166.82±15.84 <sup>A</sup> | 198.36±5.07 <sup>A</sup>  |
| <b>Esters</b>  |      |                         |                            |                            |                            |                           |                           |
| 22             | 910  | Methyl isobutyrate      | ND                         | ND                         | ND                         | ND                        | 3.09±0.43                 |
| 23             | 976  | Methyl butyrate         | 2.95±0.58 <sup>B</sup>     | 6.39±1.19 <sup>B</sup>     | 5.32±1.41 <sup>B</sup>     | 1.89±0.33 <sup>B</sup>    | 20.66±3.80 <sup>A</sup>   |
| 24             | 1010 | Methyl 2-methylbutyrate | 9.12±3.24 <sup>AB</sup>    | 5.68±0.58 <sup>AB</sup>    | 6.63±2.14 <sup>AB</sup>    | 3.35±0.61 <sup>B</sup>    | 18.07±3.32 <sup>A</sup>   |
| 25             | 1018 | Methyl Isovalerate      | 12.88±5.98 <sup>A</sup>    | 7.08±1.11 <sup>A</sup>     | 7.68±2.66 <sup>A</sup>     | ND                        | 21.02±3.63 <sup>A</sup>   |
| 26             | 1089 | Methyl pentanoate       | 16.98±6.99 <sup>AB</sup>   | 20.85±3.09 <sup>A</sup>    | 13.78±2.25 <sup>AB</sup>   | 2.97±0.02 <sup>B</sup>    | ND                        |
| 27             | 1177 | Methyl caproate         | 80.69±39.51 <sup>AB</sup>  | 126.10±0.38 <sup>AB</sup>  | 71.48±15.58 <sup>AB</sup>  | 15.20±3.55 <sup>B</sup>   | 149.75±27.24 <sup>A</sup> |
| 28             | 1223 | Ethyl caproate          | 2.06±0.52 <sup>B</sup>     | 3.35±0.16 <sup>B</sup>     | 4.68±0.21 <sup>B</sup>     | ND                        | 11.69±1.27 <sup>A</sup>   |
| 29             | 1268 | Hexyl acetate           | 0.76±0.13                  | ND                         | ND                         | ND                        | ND                        |
| 30             | 1429 | Ethyl caprylate         | ND                         | ND                         | ND                         | ND                        | 3.99±0.94                 |
| 31             | 1678 | γ-caprolactone          | 10.03±0.55 <sup>A</sup>    | 7.24±3.88 <sup>A</sup>     | ND                         | 14.47±0.60 <sup>A</sup>   | 13.97±1.22 <sup>A</sup>   |
| 32             | 1906 | γ-octalactone           | ND                         | ND                         | 13.15±0.13                 | ND                        | ND                        |
| 33             | 2028 | γ-nonanoic lactone      | ND                         | 2.31±0.14                  | ND                         | ND                        | ND                        |
|                |      | Total                   | 135.47±54.43 <sup>AB</sup> | 178.99±10.26 <sup>AB</sup> | 122.73±24.18 <sup>AB</sup> | 37.89±5.10 <sup>B</sup>   | 242.86±83.15 <sup>A</sup> |
| <b>Ketones</b> |      |                         |                            |                            |                            |                           |                           |
| 34             | 811  | Acetone                 | ND                         | 1.85±0.07 <sup>A</sup>     | ND                         | 4.82±0.52 <sup>A</sup>    | ND                        |
| 35             | 1068 | 2,3-Pentane-dione       | ND                         | 1.64±0.60                  | ND                         | ND                        | ND                        |
| 36             | 1183 | 2-Heptanone             | 7.51±2.91 <sup>C</sup>     | 9.09±0.18 <sup>AB</sup>    | 7.51±0.41 <sup>C</sup>     | 12.59±1.88 <sup>AB</sup>  | 16.27±1.22 <sup>A</sup>   |
| 37             | 1277 | 3-Hydroxybutan-2-one    | ND                         | 5.39±0.31 <sup>B</sup>     | 15.33±1.06 <sup>AB</sup>   | 11.81±0.76 <sup>B</sup>   | 22.96±2.22 <sup>A</sup>   |
| 38             | 1296 | 2-Octanone              | 3.53±0.76 <sup>A</sup>     | 4.93±0.26 <sup>A</sup>     | 3.84±0.15 <sup>A</sup>     | 5.08±0.65 <sup>A</sup>    | ND                        |
| 39             | 1320 | 2-methyloctan-3-one     | ND                         | 9.43±0.74 <sup>A</sup>     | 7.67±0.36 <sup>A</sup>     | 7.94±0.39 <sup>A</sup>    | ND                        |
| 40             | 1325 | 6-Methyl-5-hepten-2-one | 1.64±0.07 <sup>A</sup>     | 2.34±0.19 <sup>A</sup>     | 2.96±0.16 <sup>A</sup>     | ND                        | 4.07±0.65 <sup>A</sup>    |

|                  |      |                         |                          |                          |                          |                          |                          |
|------------------|------|-------------------------|--------------------------|--------------------------|--------------------------|--------------------------|--------------------------|
| 41               | 1382 | 2-Nonanone              | ND                       | 4.17±0.35                | ND                       | ND                       | ND                       |
|                  |      | Total                   | 12.69±4.57 <sup>B</sup>  | 38.85±1.35 <sup>A</sup>  | 37.33±3.90 <sup>A</sup>  | 42.24±4.20 <sup>A</sup>  | 43.30±8.18 <sup>A</sup>  |
| <b>Alkanes</b>   |      |                         |                          |                          |                          |                          |                          |
| 42               | 797  | 2,4-Dimethylheptane     | 4.36±2.31 <sup>B</sup>   | 11.82±1.12 <sup>B</sup>  | 5.56±0.33 <sup>B</sup>   | 12.63±2.40 <sup>B</sup>  | 39.10±4.88 <sup>A</sup>  |
| 43               | 1296 | Tridecane               | ND                       | 13.24±0.05               | ND                       | ND                       | ND                       |
| 44               | 1483 | 2-Methyltetradecane     | 2.40±0.12 <sup>A</sup>   | ND                       | 2.95±0.46 <sup>A</sup>   | ND                       | ND                       |
| 45               | 1154 | 1-Chloroheptane         | ND                       | ND                       | ND                       | 2.39±0.60 <sup>A</sup>   | 2.24±0.01 <sup>A</sup>   |
|                  |      | Total                   | 6.76±2.42 <sup>B</sup>   | 25.07±2.28 <sup>AB</sup> | 8.51±1.24 <sup>B</sup>   | 15.03±3.01 <sup>B</sup>  | 41.33±9.79 <sup>A</sup>  |
| <b>Pyrazines</b> |      |                         |                          |                          |                          |                          |                          |
| 46               | 1401 | 2,3,5-Trimethylpyrazine | 9.93±3.14 <sup>AB</sup>  | ND                       | 5.13±0.10 <sup>B</sup>   | 17.43±1.55 <sup>A</sup>  | 8.42±1.02 <sup>B</sup>   |
| 47               | 1466 | Tetramethylpyrazine     | 12.31±2.36 <sup>B</sup>  | ND                       | 7.98±0.07 <sup>B</sup>   | 19.27±0.58 <sup>A</sup>  | ND                       |
|                  |      | Total                   | 22.34±5.35 <sup>B</sup>  | ND                       | 13.11±0.33 <sup>BC</sup> | 36.70±2.14 <sup>A</sup>  | 8.42±2.04 <sup>C</sup>   |
| <b>Aromatic</b>  |      |                         |                          |                          |                          |                          |                          |
| 48               | 1035 | Toluene                 | 65.93±37.19 <sup>A</sup> | ND                       | 5.23±0.96 <sup>A</sup>   | 5.55±1.17 <sup>A</sup>   | 11.47±2.51 <sup>A</sup>  |
| 49               | 1122 | Ethylbenzene            | 1.93±0.62 <sup>A</sup>   | ND                       | ND                       | 2.33±1.08 <sup>A</sup>   | 2.91±0.19 <sup>A</sup>   |
| 50               | 1128 | M-xylene                | 2.27±0.10 <sup>A</sup>   | 2.35±0.44 <sup>A</sup>   | 2.90±2.16 <sup>A</sup>   | 4.65±1.81 <sup>A</sup>   | 6.67±0.94 <sup>A</sup>   |
| 51               | 1175 | O-xylene                | ND                       | 1.14±0.22 <sup>A</sup>   | ND                       | 2.45±0.50 <sup>A</sup>   | 2.91±0.24 <sup>A</sup>   |
|                  |      | Total                   | 70.14±36.67 <sup>A</sup> | 3.50±0.66 <sup>B</sup>   | 8.14±3.12 <sup>AB</sup>  | 14.98±4.55 <sup>AB</sup> | 23.96±2.26 <sup>AB</sup> |
| <b>Olefins</b>   |      |                         |                          |                          |                          |                          |                          |
| 52               | 833  | 1-Octene                | ND                       | ND                       | 0.83±0.06 <sup>A</sup>   | 1.43±0.44 <sup>A</sup>   | 1.81±0.20 <sup>A</sup>   |
| 53               | 864  | trans-2-Octene          | ND                       | 1.51±0.32 <sup>A</sup>   | ND                       | ND                       | 4.51±0.58 <sup>A</sup>   |
| 54               | 1180 | Dipentene               | ND                       | ND                       | ND                       | 4.07±0.30 <sup>A</sup>   | 10.19±1.60 <sup>A</sup>  |
|                  |      | Total                   | ND                       | 1.51±0.33 <sup>B</sup>   | 0.84±0.06 <sup>B</sup>   | 5.50±0.74 <sup>B</sup>   | 16.51±4.76 <sup>A</sup>  |
| <b>Furans</b>    |      |                         |                          |                          |                          |                          |                          |
| 55               | 1230 | 2-Pentyl furan          | 13.97±8.51 <sup>A</sup>  | 16.84±0.13 <sup>A</sup>  | 12.46±0.34 <sup>A</sup>  | 21.91±2.27 <sup>A</sup>  | 28.84±3.45 <sup>A</sup>  |
|                  |      | Total                   | 13.97±8.51 <sup>A</sup>  | 16.84±0.13 <sup>A</sup>  | 12.46±0.34 <sup>A</sup>  | 21.91±2.27 <sup>A</sup>  | 28.84±3.45 <sup>A</sup>  |

The different letters in the same row represent significant differences in the results of the Tukey test ( $p < 0.05$ ). RI—retention indices calculated concerning the retention time of n-alkane (C5–C25); ND — not detected. S: 100% NaCl; SPMA: 59.375% NaCl+28% KCl+12% MgCl<sub>2</sub>+0.625% L-arginine (Arg); SPM: 60% NaCl+28% KCl+12% MgCl<sub>2</sub>; SP: 72% NaCl+28% KCl; SM: 88% NaCl+12% MgCl<sub>2</sub>
